# Supplementary material for: Phase transformation and cycling characteristics of a Ce2Ni7-type single-phase La0.78Mg0.22Ni3.45 metal hydride alloy
Source: Royal Society of Chemistry journal article supplement (doi:10.1039/c5ta02554k), 2015-01-01
Supplement: c5ta02554k1.pdf [file c5ta02554k1.pdf]

## Supplementary Information

### Phase transformation and cycling characteristic of Ce<sub>2</sub>Ni<sub>7</sub>-type single-phase La<sub>0.78</sub>Mg<sub>0.22</sub>Ni<sub>3.45</sub> metal hydride alloy

Lu Zhang,<sup>a,b</sup> Yuan Li,<sup>a,b</sup> Xin Zhao,<sup>c</sup> Jingjing Liu,<sup>a,b</sup> Dandan Ke,<sup>a,b</sup> Wenkai Du,<sup>a,b</sup> Shuqin Yang<sup>a,b</sup> and Shumin Han<sup>\*a,b</sup>

<sup>a</sup> State Key Laboratory of Metastable Materials Science and Technology, Yanshan University, Qinhuangdao 066004, PR China

<sup>b</sup> Hebei Key Laboratory of Applied Chemistry, School of Environmental and Chemical Engineering, Yanshan University, Qinhuangdao 066004, PR China

<sup>c</sup> Baotou Research Institute of Rare Earth, Baotou 014030, PR China

❖ XRD patterns of the as-cast and all the annealed alloys

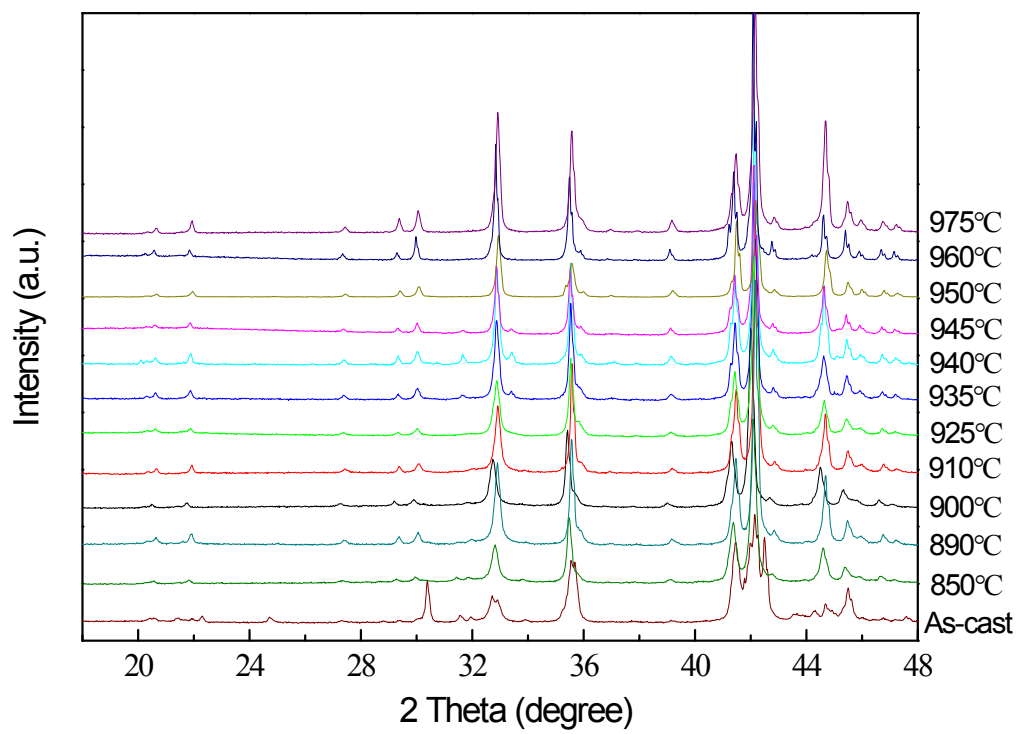

Fig. S1 Evolution of the XRD patterns in the  $2\theta$  range of 18–48° for the as-cast and alloys annealed at 850–975 °C.

❖ Particle size distribution of three groups of the annealed alloys

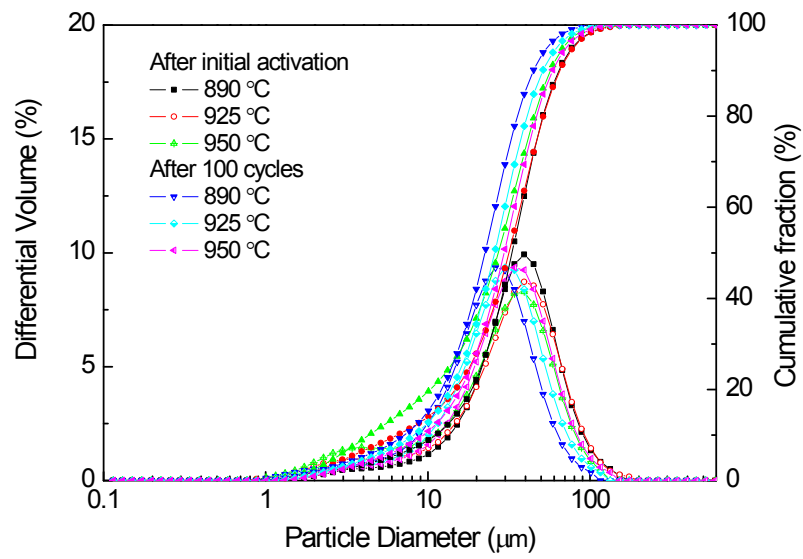

Fig. S2 Particle size distribution of the alloys annealed at 890, 945, and 950 °C for initial activation and with 100 charge-discharge cycles.

❖ XRD patterns of all the corroded alloys

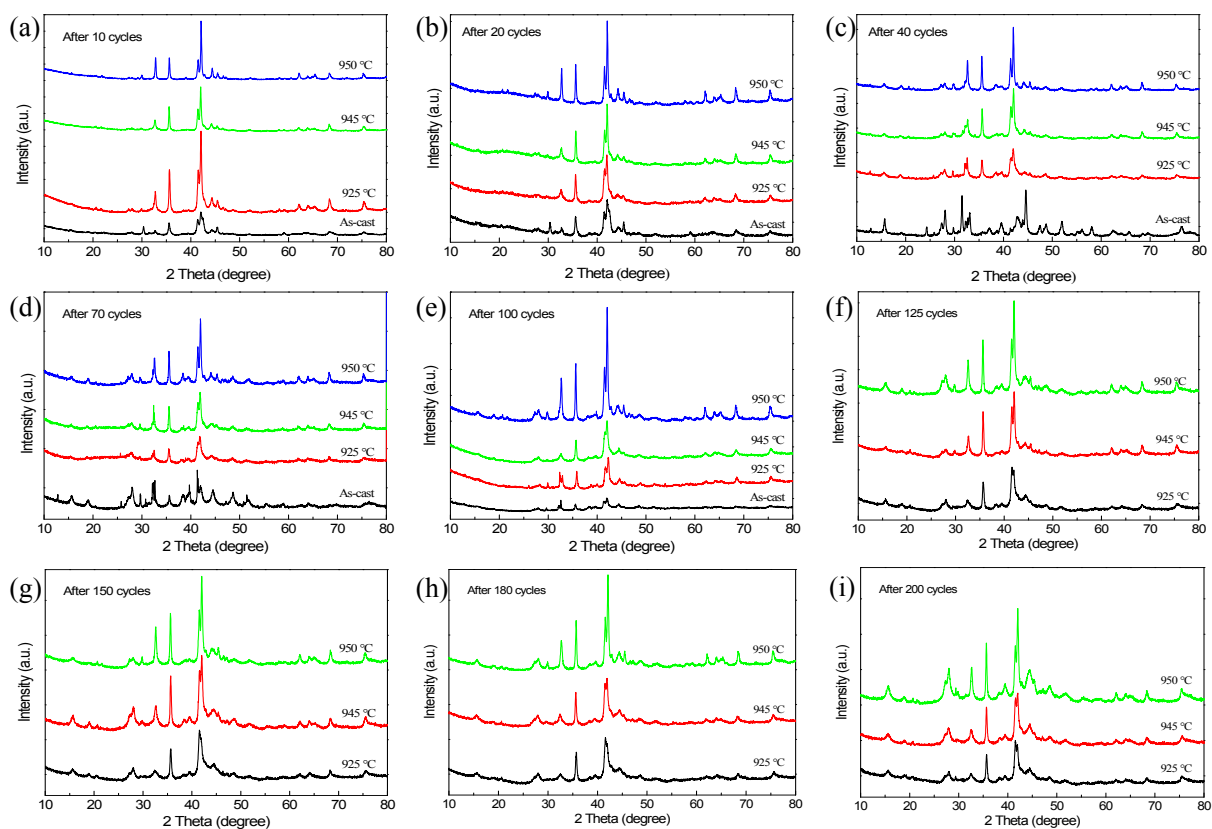

Fig. S3 XRD patterns of the as-cast and the alloys annealed at 925, 945, and 950 °C with 10 (a), 20 (b), 40 (c), 70 (d), 100 (e), 125 (f), 150 (g), 180 (h) and 200 (i) charge-discharge cycles.

Table S1 Electronic diffraction analysis on the alloy annealed at 950 °C with 100 charge-discharge cycles: comparison between experimental values of interplanar distances and PDF database of La(OH)<sub>3</sub>, Ni and LaNi<sub>5</sub>

| 1/d    | d (nm) measured with DiffTool | Relative Intensity | Distance in La(OH) <sub>3</sub> PDF n°00-036-1481 | Distance in Ni PDF n°00-065-0380 | Distance in LaNi <sub>5</sub> PDF n°00-065-1107 |
|--------|-------------------------------|--------------------|---------------------------------------------------|----------------------------------|-------------------------------------------------|
| 3.1319 | 0.319                         | 100.00             | 0.3182                                            | –                                | –                                               |
| 4.8497 | 0.206                         | 100.00             | –                                                 | 0.2041                           | –                                               |
| 3.3738 | 0.296                         | 100.00             | –                                                 | –                                | 0.2937                                          |
| 9.3284 | 0.107                         | 4.50               | –                                                 | –                                | 0.1033                                          |
